# Supplementary material
Source: publisher figshare collection journal article supplement (https://acs.figshare.com/ndownloader/files/3703210)
Supplement: Supplementary file 1 [file 3703210]

13a	CC(O1)(C)C2=C(N(C([H])([H])NC(C([H])([H])N3C([H])([H])C([H])([H])N(C4=C([H])C([H])=C([H])C([H])=C4[H])C([H])([H])C3([H])[H])=O)N=C2[H])C5=C1C([H])=C(OC)C([H])=C5[H]
13b	CC(O1)(C)C2=C([H])N(C([H])([H])NC(C([H])([H])N3C([H])([H])C([H])([H])N(C4=C([H])C([H])=C([H])C([H])=C4[H])C([H])([H])C3([H])[H])=O)N=C2C5=C1C([H])=C(OC)C([H])=C5[H]
14b	CC(O1)(C)C2=C(N(C([H])([H])NC(C([H])([H])N3C([H])([H])C([H])([H])N(C4=C(OC)C([H])=C([H])C([H])=C4[H])C([H])([H])C3([H])[H])=O)N=C2[H])C5=C1C([H])=C(OC)C([H])=C5[H]
15a	CC(O1)(C)C2=C(N(C([H])([H])NC(C([H])([H])N3C([H])([H])C([H])([H])N(C4=C(C)C(C)=C([H])C([H])=C4[H])C([H])([H])C3([H])[H])=O)N=C2[H])C5=C1C([H])=C(OC)C([H])=C5[H]
15b	CC(O1)(C)C2=C([H])N(C([H])([H])NC(C([H])([H])N3C([H])([H])C([H])([H])N(C4=C(C)C(C)=C([H])C([H])=C4[H])C([H])([H])C3([H])[H])=O)N=C2C5=C1C([H])=C(OC)C([H])=C5[H]
16-	CC(O1)(C)C2=C(N(C([H])([H])NC(C([H])([H])N3C([H])([H])C([H])([H])N(C4=C([H])C([H])=C(OC)C([H])=C4[H])C([H])([H])C3([H])[H])=O)N=C2[H])C5=C1C([H])=C(OC)C([H])=C5[H]
18a	CC(O1)(C)C2=C(N(C([H])([H])C([H])([H])N3C([H])([H])C([H])([H])N(C(C4=C([H])C([H])=C([H])O4)=O)C([H])([H])C3([H])[H])N=C2[H])C5=C1C([H])=C(OC)C([H])=C5[H]
19a	CC(O1)(C)C2=C(N(C([H])([H])C([H])([H])N3C([H])([H])C([H])([H])N(C(C4=C([H])C([H])=C([H])C([H])=C4[H])=O)C([H])([H])C3([H])[H])N=C2[H])C5=C1C([H])=C(OC)C([H])=C5[H]
19b	CC(O1)(C)C2=C([H])N(C([H])([H])C([H])([H])N3C([H])([H])C([H])([H])N(C(C4=C([H])C([H])=C([H])C([H])=C4[H])=O)C([H])([H])C3([H])[H])N=C2C5=C1C([H])=C(OC)C([H])=C5[H]
20a	CC(O1)(C)C2=C(N(C([H])([H])C([H])([H])N3C([H])([H])C([H])([H])N(C(C4=C([H])C([H])=C([H])S4)=O)C([H])([H])C3([H])[H])N=C2[H])C5=C1C([H])=C(OC)C([H])=C5[H]
20b	CC(O1)(C)C2=C([H])N(C([H])([H])C([H])([H])N3C([H])([H])C([H])([H])N(C(C4=C([H])C([H])=C([H])S4)=O)C([H])([H])C3([H])[H])N=C2C5=C1C([H])=C(OC)C([H])=C5[H]
21-	CC(O1)(C)C2=C([H])N(C([H])([H])C([H])([H])N3C([H])([H])C([H])([H])N(C(C([H])([H])OC4=C([H])C([H])=C([H])C([H])=C4[H])=O)C([H])([H])C3([H])[H])N=C2C5=C1C([H])=C(OC)C([H])=C5[H]
22-	CC(O1)(C)C2=C([H])N(C([H])([H])C([H])([H])N3C([H])([H])C([H])([H])N(C(C4([H])OC([H])([H])C([H])([H])C4([H])[H])=O)C([H])([H])C3([H])[H])N=C2C5=C1C([H])=C(OC)C([H])=C5[H]
23-	CC(O1)(C)C2=C([H])N(C([H])([H])C([H])([H])N3C([H])([H])C([H])([H])N(C(C4([H])C([H])([H])C([H])([H])C([H])([H])C([H])([H])C4([H])[H])=O)C([H])([H])C3([H])[H])N=C2C5=C1C([H])=C(OC)C([H])=C5[H]
24-	CC(O1)(C)C2=C([H])N(C([H])([H])C([H])([H])N3C([H])([H])C([H])([H])N(C(C(C)(C)C)=O)C([H])([H])C3([H])[H])N=C2C4=C1C([H])=C(OC)C([H])=C4[H]
